# Supplementary material for: Pressure-induced blue-shift emission and its influence on the band gap in an emerging 3D semiconductor
Source: Royal Society of Chemistry journal article supplement (doi:10.1039/d5qi00550g), 2025-01-01
Supplement: d5qi00550g1.pdf [file d5qi00550g1.pdf]

## Supporting Information

### Pressure Induced Blue Shift Emission and Its Influence on the Band Gap in an Emerging 3D Semiconductor †

Xia-Ying Zhao,<sup>a, ‡</sup> Lei Yue,<sup>b, ‡</sup> Meng-Yu Xu,<sup>a</sup> Gui-Fang Zhang,<sup>a</sup> Xi-Yan Dong,<sup>a,c</sup> Yong-Li Wei,<sup>\*,a</sup> and Quan-Jun Li<sup>\*,b</sup>

<sup>a</sup>*Henan Key Laboratory of Crystalline Molecular Functional Materials, and College of Chemistry, Zhengzhou University, Zhengzhou 450001, China, E-mail: weiyongli@zzu.edu.cn.*

<sup>b</sup>*State Key Laboratory of Superhard Materials, Jilin University, Changchun 130012, China, E-mail: liquanjun@jlu.edu.cn.*

<sup>c</sup>*College of Chemistry and Chemical Engineering, Henan Polytechnic University, Jiaozuo 454000, China*

<sup>‡</sup> These authors contributed equally to this work.

## Contents

|                                      |             |
|--------------------------------------|-------------|
| <b>1. Experimentals .....</b>        | <b>2-3</b>  |
| <b>2. Tables .....</b>               | <b>4-5</b>  |
| <b>3. Supplemental Figures .....</b> | <b>6-11</b> |
| <b>4. References .....</b>           | <b>12</b>   |

## Experimentals

### Instrumentation and Characterizations

Powder X-ray diffraction (PXRD) patterns of the samples were collected at room temperature using a D/MAX-3D diffractometer (Cu-K $\alpha$  radiation,  $\lambda$  = 1.54178 Å, voltage = 20-40 kV, current = 2-15 mA) over the range of  $2\theta$  = 3 to 50 at a scan speed of  $2\theta$  = 10 min<sup>-1</sup>. Elemental percentage of C, H, N and S were analyzed by a Perkin-Elmer 240 elemental analyzer. Thermogravimetric analyses (TGA) were carried out with a TA Q50 system from room temperature to 500 °C at a heating rate of 10 °C/min under a nitrogen atmosphere. UV-vis measurements were performed using a Hitachi UH4150 UV-visible spectrophotometer. Fourier transforms infrared (FT-IR) spectra were recorded on a Nexus 870 FT-IR spectrometer. Emission and excitation spectra at room temperature were recorded on a HORIBA FluoroLog-3 fluorescence spectrometer. Luminescence decay was measured on a HORIBA FluoroLog-3 fluorescence spectrometer equipped with a 355 nm laser operating in time correlated single-photon counting mode (TCSPC) with a time resolution of 340  $\mu$ s. The photoluminescence quantum yield (PLQY) was measured on a HORIBA Scientific Fluorolog-3 spectrofluorometer equipped with 450 W xenon lamp and an integrating sphere. Scanning electron microscopy (SEM) was carried out by field emission Zeiss Sigma 500.

### Single crystal X-ray diffraction analysis (SCXRD)

SCXRD measurements of  $\{\text{Ag}_{10}[(\text{CH}_3)_2\text{CHS}]_8(\text{CN})_2\}_n$  (compound **1**) were carried on a Rigaku XtaLAB pro diffractometer with Cu-K $\alpha$  radiation ( $\lambda$  = 1.54184 Å) at 200 K. Data collection and reduction were processed using the program CrysAlisPro.<sup>1</sup> The structure was assessed with intrinsic phasing methods (SHELXT-2015)<sup>2</sup> and refined by full-matrix least squares on  $F^2$  using OLEX2.<sup>3</sup> All non-hydrogen atoms were located in difference-Fourier maps and refined anisotropically. Hydrogen atoms were placed in calculated positions refined using idealized geometries

and assigned fixed isotropic displacement parameters. The crystal structures were visualized by DIAMOND 3.2.<sup>4</sup> The X-ray crystallographic data were deposited in the Cambridge Crystallographic Data Centre (CCDC). The data can be obtained free of charge from the CCDC *via* <http://www.ccdc.cam.ac.uk>.

## Tables

**Table S1.** Crystal data and structure refinement for compound **1**

|                                             | Compound <b>1</b>                                                |
|---------------------------------------------|------------------------------------------------------------------|
| CCDC number                                 | 2380767                                                          |
| Empirical formula                           | C <sub>6</sub> H <sub>13</sub> Ag <sub>2.5</sub> NS <sub>2</sub> |
| Formula weight                              | 432.97                                                           |
| Temperature (K)                             | 200                                                              |
| Crystal system                              | monoclinic                                                       |
| Space group                                 | I2/a                                                             |
| <i>a</i> (Å)                                | 8.8251 (2)                                                       |
| <i>b</i> (Å)                                | 15.4158 (3)                                                      |
| <i>c</i> (Å)                                | 16.6158 (3)                                                      |
| $\beta$ (°)                                 | 94.740 (2)                                                       |
| <i>V</i> (Å <sup>3</sup> )                  | 2552.78 (8)                                                      |
| <i>Z</i>                                    | 8                                                                |
| $\rho_{\text{calc}}$ (g / cm <sup>3</sup> ) | 2.553                                                            |
| $\mu$ (mm <sup>-1</sup> )                   | 37.669                                                           |
| <i>F</i> (000)                              | 1644.0                                                           |
| Crystal size (mm <sup>3</sup> )             | 0.01 × 0.02 × 0.4                                                |
| Radiation                                   | CuK $\alpha$ ( $\lambda$ = 1.54184 Å)                            |
| 2 $\theta$ range for data collection (°)    | 10.686 to 148.136                                                |
|                                             | -10 ≤ <i>h</i> ≤ 10,                                             |
| Index ranges                                | -18 ≤ <i>k</i> ≤ 19,                                             |
|                                             | -20 ≤ <i>l</i> ≤ 20                                              |

|                                                         |                                                                  |
|---------------------------------------------------------|------------------------------------------------------------------|
| Reflections collected                                   | 7087                                                             |
| Independent reflections                                 | 2239 [ $R_{\text{int}} = 0.0381$ , $R_{\text{sigma}} = 0.0335$ ] |
| Data/restraints/ parameters                             | 2239 / 78 / 179                                                  |
| Goodness-of-fit on $F^2$                                | 1.122                                                            |
| Final $R$ indexes [ $I \geq 2\sigma(I)$ ]               | $R_1 = 0.0494$ , $wR_2 = 0.1142$                                 |
| Final $R$ indexes [all data]                            | $R_1 = 0.0551$ , $wR_2 = 0.1176$                                 |
| Largest diff. peak/hole ( $\text{e } \text{\AA}^{-3}$ ) | 1.00/-1.37                                                       |

$$R_1 = \sum ||F_o| - |F_c|| / \sum |F_o|. \quad wR_2 = [\sum w(F_o^2 - F_c^2)^2 / \sum w(F_o^2)^2]^{1/2}$$

**Table S2.** Refined lattice parameters and the unit-cell volumes of compound **1** at different pressure.

| Space group | Pressure | $a$ ( $\text{\AA}$ ) | $b$ ( $\text{\AA}$ ) | $c$ ( $\text{\AA}$ ) | $\theta$ ( $^\circ$ ) | $V$ ( $\text{\AA}^3$ ) |
|-------------|----------|----------------------|----------------------|----------------------|-----------------------|------------------------|
|             | (GPa)    |                      |                      |                      |                       |                        |
| $I2/a$      | 1 atm    | 8.83322              | 15.36488             | 16.60949             | 94.721                | 2246.613               |
|             | 0.5      | 8.77316              | 15.22591             | 16.31379             | 95.714                | 2168.358               |
|             | 1.0      | 8.73723              | 15.11045             | 16.11140             | 96.615                | 2112.923               |
|             | 1.7      | 8.67822              | 14.98548             | 15.89973             | 97.483                | 2050.104               |
| $P2_1/c$    | 2.4      | 8.64832              | 14.89062             | 15.73830             | 98.058                | 2006.752               |
|             | 3.6      | 8.58844              | 14.76224             | 15.48983             | 98.420                | 1942.702               |
|             | 4.8      | 8.51176              | 14.64990             | 15.29595             | 98.820                | 1884.798               |
|             | 6.5      | 8.35633              | 14.56843             | 15.20552             | 99.146                | 1827.567               |
|             | 8.3      | 8.27221              | 14.42626             | 15.14856             | 99.638                | 1782.267               |
|             | 10.5     | 8.21607              | 14.33895             | 15.11040             | 100.189               | 1752.081               |
|             | 13.1     | 8.11765              | 14.17760             | 15.10790             | 103.811               | 1688.485               |
|             | 16.6     | 8.09958              | 14.13449             | 15.07487             | 104.027               | 1679.103               |
|             | D 1 atm  | 8.97046              | 15.32827             | 16.92922             | 94.841                | 2319.492               |

## Supplemental Figures

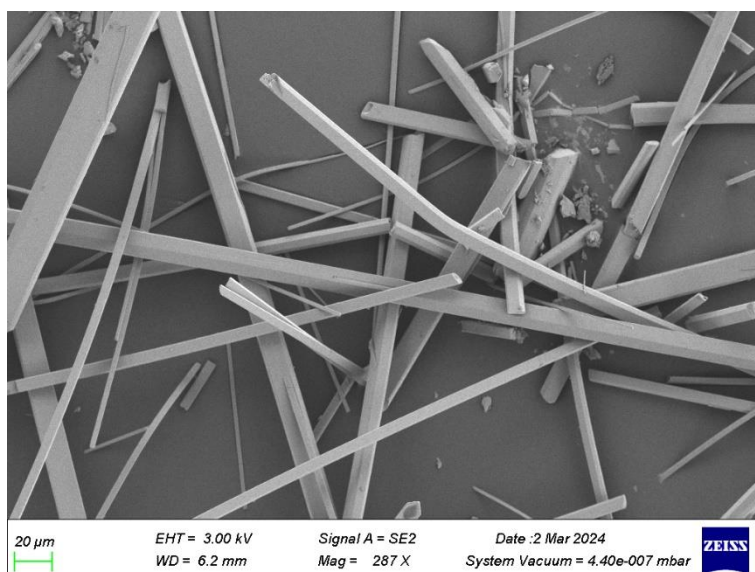

**Figure S1.** SEM micrographs of compound **1**.

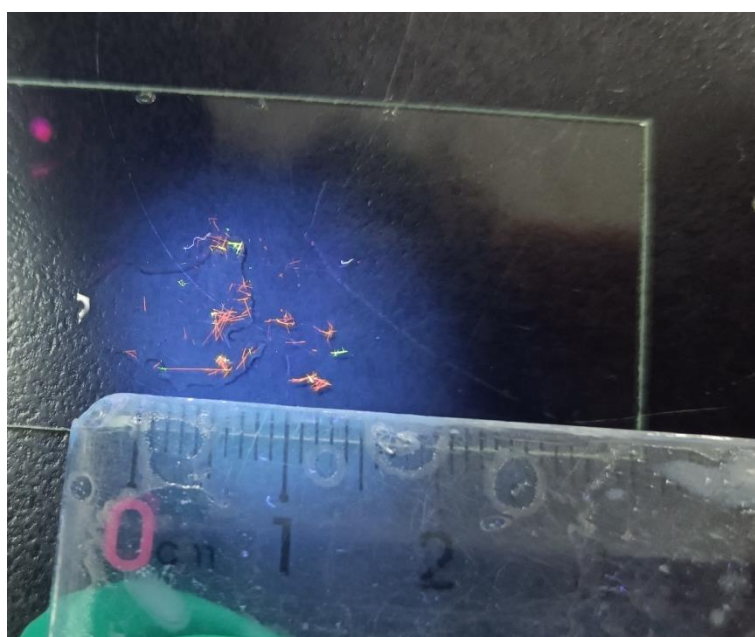

**Figure S2.** The length of macroscopically wire crystals under ultraviolet irradiation.

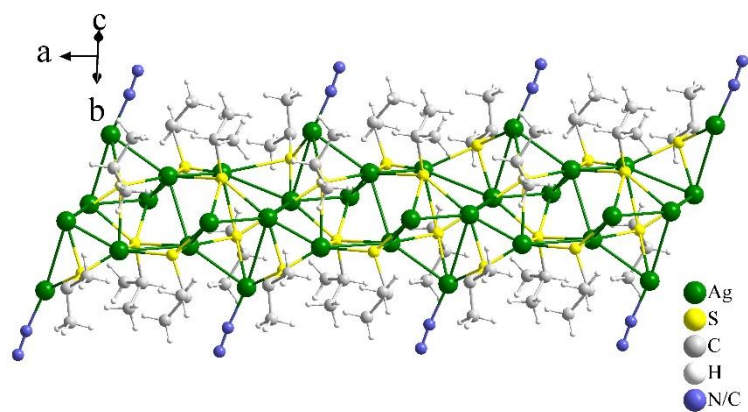

**Figure S3.** The 1D chains were protected by organic isopropyl sulfide ligands.

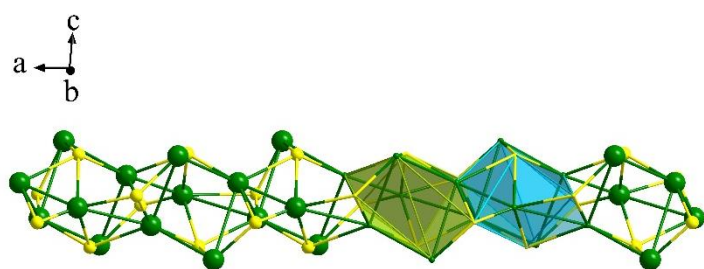

**Figure S4.** The core of the chain is composed of repeating irregular  $\text{Ag}_7\text{S}_6$  tetrakaidecahedra.

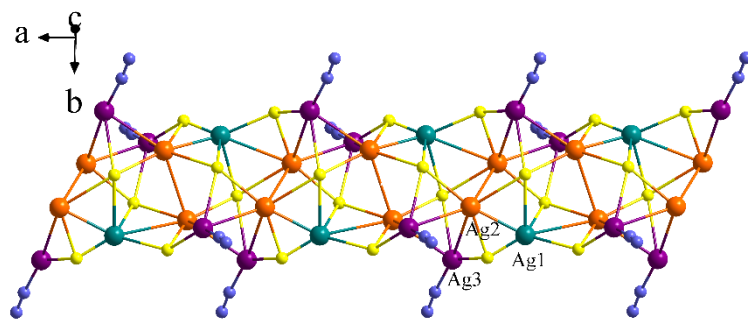

**Figure S5.** Different color indicates different coordination environment of silver atoms (indigo, orange, purple). Blue, C/N; yellow, S.

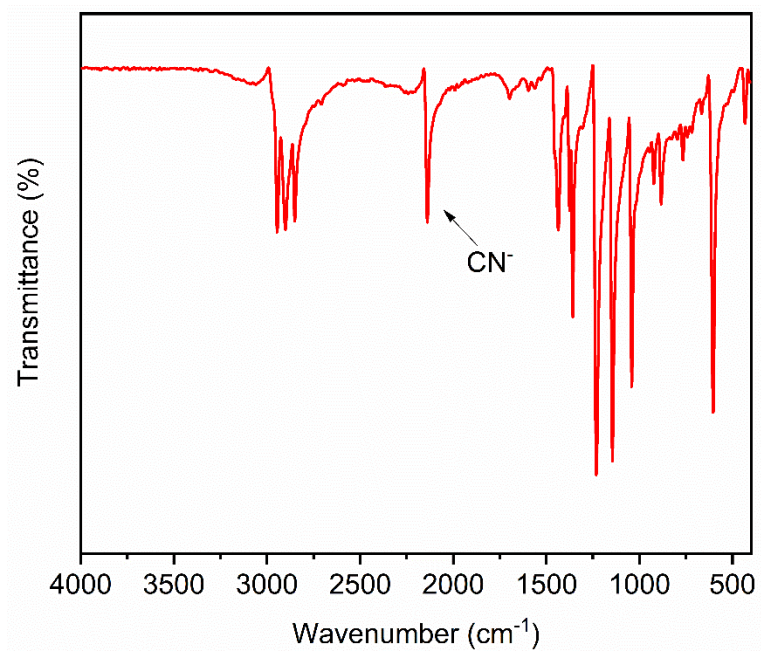

**Figure S6.** FT-IR spectra of compound **1**. The absorption peak at 2138 cm<sup>-1</sup> is assigned to the nitrile group

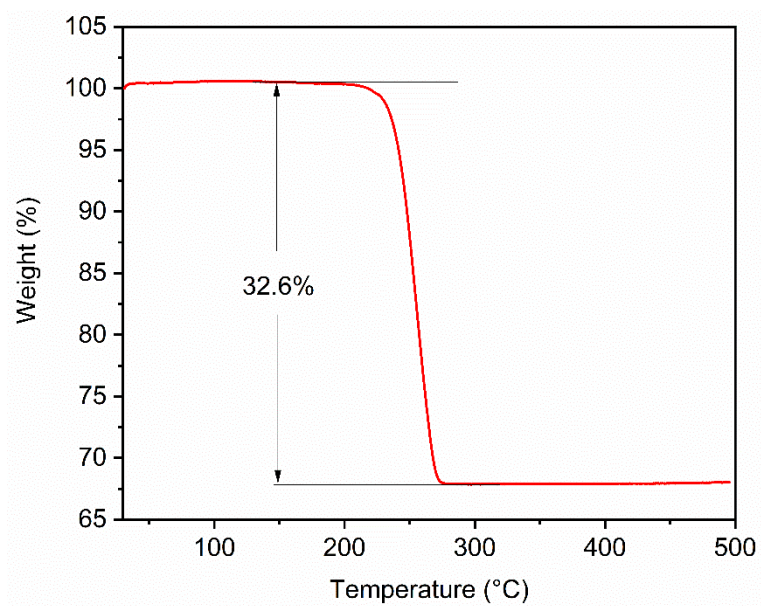

**Figure S7.** TGA of compound **1** under nitrogen atmosphere.



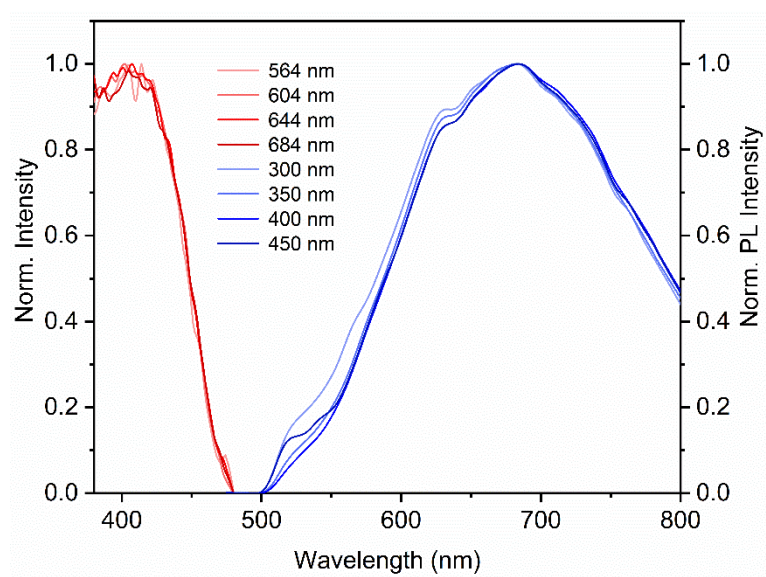

**Figure S8.** PL excitation (red, left) and emission (blue, right) spectra of compound **1**.

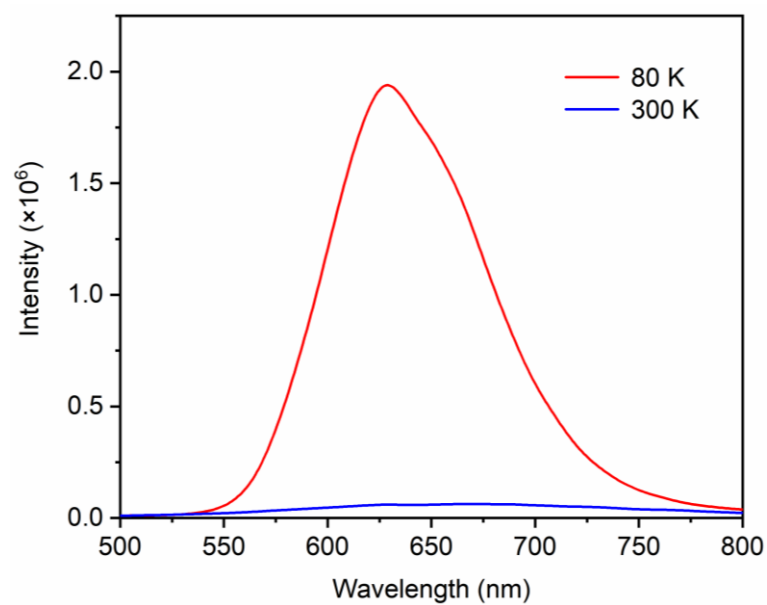

**Figure S9.** PL spectra of compound **1** at 80 K and 300 K.

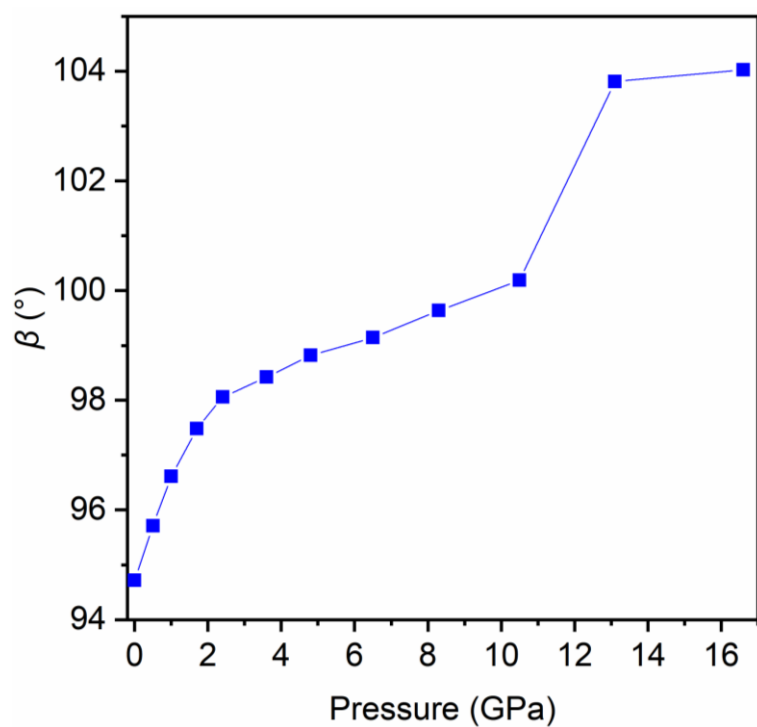

**Figure S10.**  $\beta$  of compound **1** under compression.

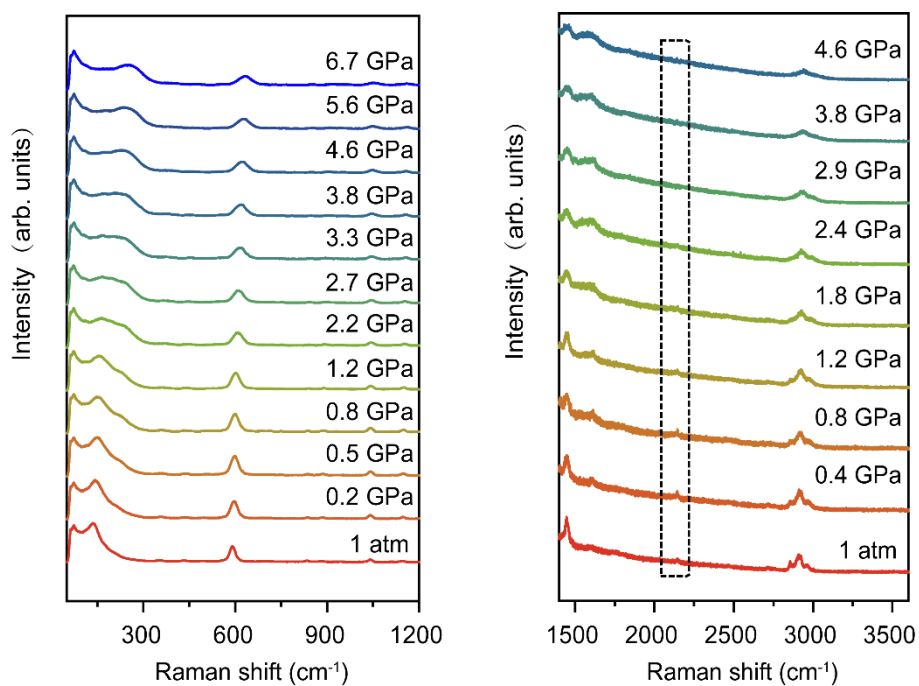

**Figure S11.** Raman spectra (a, b) of compound **1** at different pressure. It can be obviously seen from dotted box that the nitrile group disappears at 2.4 GPa.

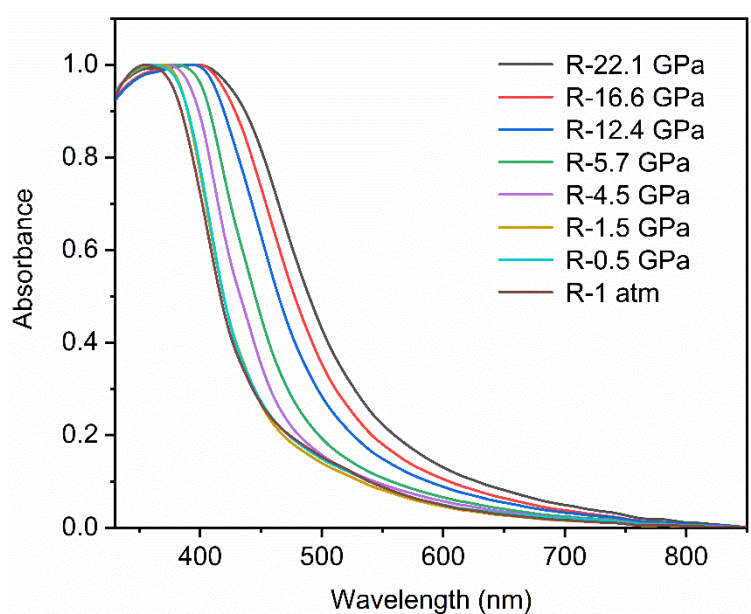

**Figure S12.** Absorption Spectrum of compound **1** under decompression.

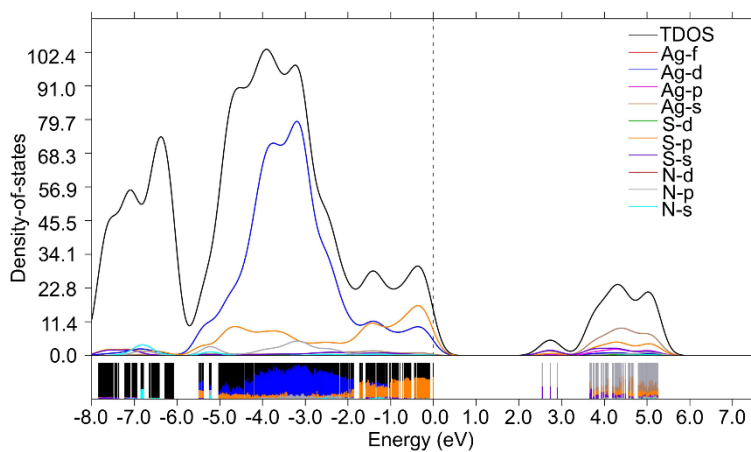

**Figure S13.** Calculated projected density of states (PDOS) for compound **1** under the normal pressure.

## References

1. CrysAlisPro 2012, Agilent Technologies. Version 1.171.36.31.
2. G. M. Sheldrick, *Acta Cryst. A* 2015, **71**, 3-8.
3. G. M. Sheldrick, *Acta Cryst. A* 2008, **64**, 112-122.
4. K. Brandenburg, *Diamond*, 2010.
